# Supplementary material for: Premature termination codon rs67047829 in ERV3-1 may be protective against obesity
Source: Research Square preprint supplement (doi:10.21203/rs.3.rs-1509014/v1), 2022-04-25
Supplement: Supplementary file 1 [file 4de4d63a2268206f99ed3cc9.xlsx]

## Sheet: Sheet1
Supplemental_Table_S3: Body mass index (BMI) data for each allele and genotype from the Populous database, together with preliminary regression data,
for 139 pretermination single nucleotide polymorphisms.
Article: Premature termination codon rs67047829 in ERV3-1 may be protective against obesity.
Authors: Jeremy Clark, Konrad Podsiadło, Marta Sobalska-Kwapis, Błażej Marciniak, Kamila Rydzewska, Andrzej Ciechanowicz, Thierry van de Wetering, Dominik Strapagiel
This table only contains data for all subjects with BMI data in Populous database.
Number:								Number of single nucleotide polymorphism (SNP) in Tables S1 and S3..
rs number:								SNP rs number: see dbSNP (https://www.ncbi.nlm.nih.gov/snp). Row for rs67047829 in yellow highlight.
Populous base change:								Base change from Populous database: first allele is major allele (PRE sgnifies that major allele is pretermination allele: non-reference or reference: for reference allele see Table 1).
Alleles and Genotypes:								Number with each SNP value (missing data given as zeros in S2); and BMI: median, median absolute deviation (m.a.d.), mean and standard deviation (s.d.).
BMI: coninuous:								Body mass index (BMI) treated as a continuous variable.
BMI: categorical:								BMI treated as a categorical variable with four groups (defined in text): only groups 2 and 4 compared.
p-values (3 significant figures) p < 0.05 in red (NA or - = no data):
codominant to log-additive:								Model p-values from R [SNPassoc] WGassociation: codominant (Codom.), dominant (Dom.), recessive (Rec.), overdominant (Overdom.), log-additive (Log-add.).
Groups 1 to 4:								Numbers (Num) of subjects homozygous for minor alleles with each BMI group and as a % (1 decimal place) of all subjects in one group.
Fisher.test_p.val								p-value from R [stats] fisher.test(simulate.p.value = TRUE) from 2 x 2 tables comparing groups 2 and 4 and homozygous minor allele with major allele carriers.
CA_pval								p-value from R [DescTools] CochranArmitageTest from 2 x 2 tables as for Fisher tests.
Number	rs number	Populous base change	Allele 1		Allele 2		Missing	Genotype 1 homozygotes						Heterozygotes						Genotype 2 homozygotes						Missing	BMI-continuous					BMI-continuous					BMI-categorical									Comparison of groups 2 and 4 and subjects with or without homozygous minor		Comparisons with false discovery rate adjustment
							alleles																			genotypes						with false discovery rate adjustment					Subjects with homozygote minor alleles in BMI groups
			Value	Number	Value	Number		Value	Number	BMI				Value	Number	BMI				Value	Number	BMI															Group 1		Group 2		Group 3		Group 4		All Groups
										median	m.a.d.	mean	s.d.			median	m.a.d.	mean	s.d.			median	m.a.d.	mean	s.d.		Codom.	Dom.	Rec.	Overdom.	Log-add.	Codom.	Dom.	Rec.	Overdom.	Log-add.	Num	%	Num	%	Num	%	Num	%	Number	Fisher-pval	CA_pval	Fisher-pval	CA_pval
1	rs10237332	C/T	C	10187	T	3	0	CC	5092	24	3	24.8	4.56	CT	3	28	2	25.7	5.86	TT	0	NA	NA	NA	NA	0	0.684	-	-	-	-	0.96	NA	NA	NA	NA	0	0	0	0	0	0	0	0	0	-	-	NA	NA
2	rs1023840	C/T	C	8182	T	2008	0	CC	3286	24	3	24.8	4.45	CT	1610	24	3	25	4.8	TT	199	24	3	24.6	4.27	0	0.0738	0.131	0.217	0.0379	0.394	0.843	0.771	0.962	0.565	0.891	4	2.162	103	4.167	65	3.833	27	3.639	199	0.612	0.854	0.932	0.956
3	rs10261977	C/T	C	8502	T	1688	0	CC	3543	24	3	24.9	4.57	CT	1416	24	3	24.8	4.52	TT	136	24	3	24.9	4.56	0	0.467	0.217	0.783	0.243	0.244	0.96	0.771	0.982	0.763	0.833	3	1.622	70	2.832	46	2.712	18	2.426	137	0.833	0.865	0.978	0.957
4	rs10423255	C/T	C	9294	T	748	74	CC	4299	24	3	24.8	4.54	CT	696	24	3	25	4.7	TT	26	25	3	25.3	4.33	74	0.288	0.124	0.546	0.15	0.115	0.897	0.771	0.962	0.697	0.833	1	0.552	11	0.451	9	0.54	5	0.679	26	0.764	0.498	0.97	0.923
5	rs1043149	C/T	C	8419	T	1771	0	CC	3492	24	3	24.8	4.5	CT	1435	24	3	24.8	4.69	TT	168	25	3	25.1	4.7	0	0.644	0.903	0.353	0.815	0.684	0.96	0.99	0.962	0.961	0.891	6	3.243	75	3.034	60	3.538	27	3.639	168	0.743	0.352	0.966	0.923
6	rs1043261	C/T	C	9438	T	750	1	CC	4369	24	3	24.9	4.53	CT	700	24	3	24.7	4.73	TT	25	24	3	24.4	4.24	1	0.135	0.184	0.532	0.0498	0.682	0.887	0.771	0.962	0.565	0.891	54	37.241	617	33.551	420	31.988	173	31.569	1264	0.463	0.154	0.932	0.923
7	rs1044261	C/T	C	9570	T	620	0	CC	4487	24	3	24.8	4.6	CT	596	24	3	24.8	4.28	TT	12	24.5	1.5	25	3.07	0	0.864	0.813	0.653	0.759	0.869	0.965	0.99	0.962	0.939	0.956	0	0	6	0.243	5	0.295	1	0.135	12	0.911	0.984	1	0.984
8	rs10471773	G/A	A	306	G	9884	0	AA	2	21.5	0.5	21.5	0.707	GA	302	25	3	25	4.62	GG	4791	24	3	24.8	4.56	0	0.309	0.39	0.239	0.322	0.47	0.92	0.813	0.962	0.763	0.891	0	0	2	0.081	0	0	0	0	2	0.678	0.286	0.932	0.923
9	rs10491178	G/A	A	475	G	9709	3	AA	18	23.5	2.5	24.5	4.67	GA	439	24	3	25	4.64	GG	4635	24	3	24.8	4.55	3	0.669	0.383	0.98	0.37	0.418	0.96	0.813	0.992	0.763	0.891	1	0.541	10	0.405	4	0.236	3	0.404	18	0.58	0.633	0.932	0.923
10	rs10838851	A(PRE)/T	A	7986	T	2204	0	AA	3113	24	3	24.8	4.54	AT	1760	24	3	24.9	4.6	TT	222	24	3	24.9	4.51	0	0.348	0.151	0.861	0.162	0.205	0.926	0.771	0.982	0.697	0.833	6	3.243	114	4.612	71	4.186	31	4.178	222	0.825	0.758	0.978	0.951
11	rs10981589	G/A	A	456	G	9730	2	AA	12	25.5	2	27.1	5.26	GA	432	24	3	25	4.53	GG	4649	24	3	24.8	4.56	2	0.212	0.318	0.113	0.457	0.225	0.887	0.771	0.962	0.838	0.833	0	0	5	0.202	5	0.295	2	0.27	12	0.833	0.471	0.978	0.923
12	rs11071990	G/A	G	10121	A	45	12	GG	5038	24	3	24.8	4.57	GA	45	24	2	24.5	3.81	AA	0	NA	NA	NA	NA	12	0.542	-	-	-	-	0.96	NA	NA	NA	NA	0	0	0	0	0	0	0	0	0	-	-	NA	NA
13	rs111350153	T/A	A	185	T	10001	2	AA	3	23	0	22.3	1.15	TA	179	24	3	25	3.93	TT	4911	24	3	24.8	4.58	2	0.934	0.814	0.749	0.852	0.782	0.97	0.99	0.982	0.97	0.956	0	0	3	0.121	0	0	0	0	3	0.463	0.191	0.932	0.923
14	rs111696697	A/T	A	9834	T	350	3	AA	4748	24	3	24.8	4.54	AT	338	24	3	24.8	4.85	TT	6	23.5	2.5	22.5	3.83	3	0.0135	0.413	0.042	0.00442	0.486	0.52	0.817	0.962	0.242	0.891	49	35.507	612	33.906	433	32.679	161	29.76	1255	0.284	0.0636	0.932	0.773
15	rs112033303	T/A	A	327	T	9779	42	AA	5	22	4	21.4	3.44	TA	317	24	3	24.8	4.79	TT	4731	24	3	24.8	4.53	42	0.186	0.847	0.135	0.0948	0.451	0.887	0.99	0.962	0.565	0.891	51	36.17	596	32.026	411	32.439	190	35.185	1248	0.43	0.443	0.932	0.923
16	rs112050262	G/A	G	10065	A	123	1	GG	4971	24	3	24.8	4.55	GA	123	24	3	24.8	5.1	AA	0	NA	NA	NA	NA	1	0.997	0.942	0.98	0.963	0.955	0.997	0.99	0.992	0.993	0.985	40	28.777	612	33.045	414	32.394	199	34.912	1265	0.525	0.355	0.932	0.923
17	rs11228710	T(PRE)/C	C	3736	T	6452	1	CC	686	24	3	25	4.82	TC	2364	24	3	24.7	4.59	TT	2044	24	3	24.9	4.43	1	0.382	0.605	0.294	0.219	0.878	0.926	0.966	0.962	0.723	0.956	24	12.973	331	13.39	228	13.443	103	13.9	686	0.981	0.714	1	0.951
18	rs11231341	C(PRE)/A	A	2087	C	8103	0	AA	219	24	3	24.9	4.62	CA	1649	24	3	24.8	4.68	CC	3227	24	3	24.9	4.49	0	0.785	0.529	0.644	0.654	0.488	0.96	0.903	0.962	0.912	0.891	13	7.027	100	4.045	67	3.95	39	5.256	219	0.118	0.772	0.932	0.951
19	rs114429815	C/T	C	10185	T	1	2	CC	5092	24	3	24.8	4.56	CT	1	28	0	28	NA	TT	0	NA	NA	NA	NA	2	0.332	0.263	0.764	0.16	0.638	0.926	0.771	0.982	0.697	0.891	41	29.71	609	33.08	416	32.099	194	34.829	1260	0.581	0.481	0.932	0.923
20	rs114730569	G/A	G	9985	A	1	102	GG	4992	24	3	24.8	4.55	GA	1	22	0	22	NA	AA	0	NA	NA	NA	NA	102	0.86	0.692	0.599	0.9	0.594	0.965	0.99	0.962	0.979	0.891	49	35.252	614	32.799	416	32.73	181	32.149	1260	0.915	0.63	1	0.923
21	rs11542462	G/A	A	1189	G	9001	0	AA	70	24	3	24.7	4.14	GA	1049	24	3	24.8	4.67	GG	3976	24	3	24.8	4.54	0	0.994	0.999	0.918	0.976	0.98	0.997	0.999	0.992	0.994	0.991	4	2.162	34	1.375	23	1.356	9	1.213	70	0.729	0.521	0.96	0.923
22	rs115917139	C/T	C	9498	T	338	177	CC	4592	24	3	24.8	4.57	CT	314	25	3	24.9	4.44	TT	12	24	3	25.3	6.61	177	0.545	0.496	0.329	0.617	0.409	0.96	0.877	0.962	0.912	0.891	1	0.559	5	0.21	4	0.244	2	0.277	12	0.624	0.974	0.932	0.984
23	rs116389032	T/A	A	182	T	9998	5	AA	4	22.5	0.5	22.2	0.957	TA	174	24	3	24.9	4.74	TT	4912	24	3	24.8	4.55	5	0.183	0.0725	0.575	0.208	0.175	0.887	0.7	0.962	0.723	0.833	42	33.071	606	32.774	442	34.237	169	30.287	1259	0.421	0.58	0.932	0.923
24	rs117366703	C/T	C	10001	T	157	16	CC	4924	24	3	24.8	4.56	CT	153	24	3	24.9	4.59	TT	2	21.5	0.5	21.5	0.707	16	0.58	0.97	0.299	0.911	0.856	0.96	0.99	0.962	0.98	0.956	0	0	2	0.081	0	0	0	0	2	0.682	0.286	0.932	0.923
25	rs117752382	A/T	A	10057	T	129	2	AA	4964	24	3	24.8	4.57	AT	129	25	3	24.7	4.03	TT	0	NA	NA	NA	NA	2	0.942	-	-	-	-	0.971	NA	NA	NA	NA	0	0	0	0	0	0	0	0	0	-	-	NA	NA
26	rs118004742	T/G	G	570	T	9596	12	GG	13	23	3	22.6	3.36	TG	544	24.5	2.5	24.9	4.28	TT	4526	24	3	24.8	4.6	12	0.722	0.978	0.427	0.879	0.927	0.96	0.99	0.962	0.979	0.966	2	1.081	7	0.284	4	0.236	0	0	13	0.096	0.0439	0.932	0.773
27	rs11913840	C/T	C	9948	T	232	5	CC	4862	24	3	24.8	4.57	CT	224	25	3	25	4.4	TT	4	24.5	3.5	25.8	5.85	5	0.74	0.897	0.438	0.991	0.81	0.96	0.99	0.962	0.994	0.956	0	0	2	0.081	1	0.059	1	0.135	4	0.699	0.677	0.932	0.929
28	rs12077871	G/A	G	10178	A	12	0	GG	5083	24	3	24.8	4.56	GA	12	26	2	25.3	2.99	AA	0	NA	NA	NA	NA	0	0.101	0.0606	0.992	0.0647	0.272	0.887	0.697	0.992	0.565	0.871	36	26.277	585	31.776	427	33.178	179	32.605	1227	0.397	0.249	0.932	0.923
29	rs12139100	G/A	A	1820	G	8366	2	AA	167	24	3	24.8	4.95	GA	1486	25	3	25	4.67	GG	3440	24	3	24.8	4.49	2	0.929	0.94	0.773	0.718	0.903	0.97	0.99	0.982	0.935	0.956	44	34.921	602	32.383	430	34.263	176	31.541	1252	0.574	0.927	0.932	0.982
30	rs12240276	C/T	C	8450	T	1734	3	CC	3493	24	3	24.8	4.57	CT	1464	24	3	24.8	4.49	TT	135	24	3	24.9	4.79	3	0.837	0.552	0.925	0.565	0.584	0.96	0.924	0.992	0.912	0.891	3	1.622	69	2.791	39	2.302	24	3.239	135	0.463	0.598	0.932	0.923
31	rs12520799	T/A	A	4117	T	6071	1	AA	854	24	3	24.6	4.37	TA	2409	24	3	24.9	4.56	TT	1831	24	3	24.9	4.64	1	0.186	0.393	0.0692	0.594	0.12	0.887	0.813	0.962	0.912	0.833	32	17.297	429	17.361	289	17.04	105	14.151	855	0.212	0.0857	0.932	0.773
32	rs12568784	G/T	G	8638	T	1552	0	GG	3668	24	3	24.9	4.5	GT	1302	24	3	24.8	4.73	TT	125	24	3	24.2	4.38	0	0.211	0.638	0.211	0.0895	0.657	0.887	0.99	0.962	0.565	0.891	50	35.971	574	31.332	450	34.938	182	33.517	1256	0.155	0.254	0.932	0.923
33	rs12925771	G/A	A	2803	G	7377	5	AA	370	24	3	25	4.48	GA	2063	24	3	24.9	4.66	GG	2657	24	3	24.7	4.49	5	0.444	0.263	0.798	0.202	0.429	0.96	0.771	0.982	0.723	0.891	11	5.946	179	7.244	133	7.851	47	6.351	370	0.55	0.93	0.932	0.982
34	rs13338754	G/A	G	10187	A	3	0	GG	5092	24	3	24.8	4.56	GA	3	27	1	27	1	AA	0	NA	NA	NA	NA	0	-	-	-	-	-	NA	NA	NA	NA	NA	0	0	0	0	0	0	0	0	0	-	-	NA	NA
35	rs138377917	G/A	A	127	G	9297	383	AA	4	21	2.5	23.2	6.85	GA	119	24	3	24.5	4.88	GG	4589	24	3	24.8	4.56	383	0.59	0.306	0.786	0.322	0.308	0.96	0.771	0.982	0.763	0.871	1	0.559	2	0.087	0	0	1	0.146	4	0.0841	0.392	0.932	0.923
36	rs1459101	C/T	C	7669	T	2519	1	CC	2855	24	3	24.9	4.65	CT	1959	24	3	24.8	4.44	TT	280	24	3	24.8	4.44	1	0.587	0.324	0.982	0.309	0.419	0.96	0.771	0.992	0.763	0.891	11	5.946	132	5.342	94	5.542	43	5.795	280	0.931	0.73	1	0.951
37	rs146753414	C/A	A	134	C	10054	1	AA	1	22	0	22	NA	CA	132	24	3	24.5	4.35	CC	4961	24	3	24.8	4.56	1	0.282	0.292	0.193	0.362	0.238	0.897	0.771	0.962	0.763	0.833	0	0	1	0.04	0	0	0	0	1	1	0.45	1	0.923
38	rs1476860	G/A	A	3096	G	7092	1	AA	471	24	3	24.8	4.81	GA	2154	24	3	24.7	4.48	GG	2469	24	3	24.9	4.58	1	0.7	0.712	0.54	0.468	0.988	0.96	0.99	0.962	0.842	0.991	17	9.189	226	9.146	166	9.788	63	8.491	472	0.779	0.876	0.973	0.959
39	rs150843673	G/T	G	10016	T	170	2	GG	4926	24	3	24.8	4.54	GT	164	24	3	24.7	5.25	TT	3	24	1	24.7	2.08	2	0.909	0.849	0.68	0.891	0.811	0.97	0.99	0.962	0.979	0.956	0	0	2	0.081	1	0.059	0	0	3	1	0.571	1	0.923
40	rs16910526	A/C	A	9446	C	742	1	AA	4374	24	3	24.9	4.57	AC	698	24	3	24.7	4.48	CC	22	23	2.5	22.9	4.66	1	0.844	0.56	0.904	0.57	0.563	0.96	0.924	0.992	0.912	0.891	4	2.162	10	0.405	5	0.295	3	0.404	22	0.0228	0.104	0.593	0.773
41	rs16930998	G/A	G	9998	A	192	0	GG	4903	24	3	24.8	4.56	GA	192	25	3	25.2	4.45	AA	0	NA	NA	NA	NA	0	0.228	-	-	-	-	0.887	NA	NA	NA	NA	0	0	0	0	0	0	0	0	0	-	-	NA	NA
42	rs17001893	G/A	G	10188	A	2	0	GG	5093	24	3	24.8	4.56	GA	2	26	3	26	4.24	AA	0	NA	NA	NA	NA	0	0.932	-	-	-	-	0.97	NA	NA	NA	NA	0	0	0	0	0	0	0	0	0	-	-	NA	NA
43	rs17184009	C/T	C	10084	T	106	0	CC	4989	24	3	24.8	4.57	CT	106	25	2	24.9	4.05	TT	0	NA	NA	NA	NA	0	0.496	-	-	-	-	0.96	NA	NA	NA	NA	0	0	0	0	0	0	0	0	0	-	-	NA	NA
44	rs17292725	G/A	A	356	G	9820	7	AA	4	27.5	2	26.5	4.04	GA	348	24	3	24.9	4.67	GG	4736	24	3	24.8	4.55	7	0.898	0.643	0.969	0.645	0.645	0.97	0.99	0.992	0.912	0.891	0	0	1	0.041	2	0.118	1	0.135	4	0.556	0.289	0.932	0.923
45	rs17602729	G/A	A	1624	G	8556	5	AA	149	24	3	24.8	4.19	GA	1326	24	3	24.7	4.38	GG	3615	24	3	24.9	4.63	5	0.84	0.878	0.673	0.57	0.877	0.96	0.99	0.962	0.912	0.956	48	34.286	581	32.064	412	32.75	181	32.969	1222	0.924	0.802	1	0.951
46	rs1790218	A(PRE)/G	A	5574	G	4114	251	AA	1558	24	3	24.7	4.35	AG	2458	24	3	24.9	4.61	GG	828	24	3	24.8	4.79	251	0.37	0.158	0.638	0.346	0.224	0.926	0.771	0.962	0.763	0.833	43	23.889	396	17.01	251	15.389	138	19.574	828	0.007	0.805	0.421	0.951
47	rs1815739	C/T	C	6045	T	4137	4	CC	1816	24	3	25	4.62	CT	2413	24	3	24.7	4.56	TT	862	24	3	24.7	4.43	4	0.401	0.22	0.345	0.639	0.178	0.926	0.771	0.962	0.912	0.833	36	19.459	418	16.916	291	17.188	118	15.903	863	0.671	0.437	0.932	0.923
48	rs183603441	T/A	A	117	T	10063	5	AA	1	27	0	27	NA	TA	115	23	3	24.1	4.53	TT	4974	24	3	24.8	4.56	5	0.245	-	-	-	-	0.887	NA	NA	NA	NA	0	0	0	0	1	0.059	0	0	1	0.516	0.596	0.932	0.923
49	rs1861050	C/T	C	9713	T	413	32	CC	4661	24	3	24.8	4.54	CT	391	24	3	24.9	4.79	TT	11	24	4	25.5	6.02	32	0.749	0.506	0.513	0.994	0.448	0.96	0.879	0.962	0.994	0.891	46	33.824	596	32.286	415	32.524	189	33.75	1246	0.91	0.675	1	0.929
50	rs2039381	G/A	G	10104	A	86	0	GG	5009	24	3	24.8	4.56	GA	86	25	3	24.7	4.42	AA	0	NA	NA	NA	NA	0	0.787	-	-	-	-	0.96	NA	NA	NA	NA	0	0	0	0	0	0	0	0	0	-	-	NA	NA
51	rs2176186	C/T	C	6756	T	3432	1	CC	2230	24	3	24.9	4.51	CT	2296	24	3	24.8	4.58	TT	568	24	3	24.7	4.66	1	0.845	0.98	0.606	0.628	0.756	0.96	0.99	0.962	0.912	0.936	43	31.159	601	33.04	406	31.04	153	29.032	1203	0.321	0.0977	0.932	0.773
52	rs2233919	G/A	G	10102	A	4	42	GG	5049	24	3	24.8	4.56	GA	4	23	2	22.8	2.63	AA	0	NA	NA	NA	NA	42	0.236	-	-	-	-	0.887	NA	NA	NA	NA	0	0	0	0	0	0	0	0	0	-	-	NA	NA
53	rs2235197	G/A	A	829	G	9111	125	AA	44	25	2	25	3.5	GA	741	24	3	24.8	4.35	GG	4185	24	3	24.8	4.61	125	0.788	0.49	0.865	0.507	0.495	0.96	0.877	0.982	0.889	0.891	1	0.556	18	0.748	22	1.328	3	0.413	44	0.118	0.838	0.932	0.956
54	rs2270416	C/A	A	272	C	9842	38	AA	4	27	1	25.5	3.79	CA	264	24	3	24.7	4.29	CC	4789	24	3	24.8	4.57	38	0.748	0.76	0.472	0.804	0.719	0.96	0.99	0.962	0.959	0.924	0	0	1	0.041	3	0.178	0	0	4	0.464	0.679	0.932	0.929
55	rs2272754	G/T	G	8582	T	1592	8	GG	3634	24	3	24.8	4.57	GT	1314	24	3	24.8	4.54	TT	139	24	3	24.8	4.68	8	0.814	0.738	0.659	0.612	0.877	0.96	0.99	0.962	0.912	0.956	5	2.703	66	2.674	49	2.896	19	2.561	139	0.967	0.976	1	0.984
56	rs2273865	T/A	A	268	T	9920	1	AA	4	22.5	0.5	24	3.37	TA	260	24	3	24.4	4.36	TT	4830	24	3	24.9	4.57	1	0.487	0.919	0.33	0.279	0.618	0.96	0.99	0.962	0.763	0.891	43	31.618	622	33.423	399	31.467	173	31.171	1237	0.617	0.286	0.932	0.923
57	rs2293766	G/A	G	10138	A	50	1	GG	5044	24	3	24.8	4.56	GA	50	25	2	25.2	4.42	AA	0	NA	NA	NA	NA	1	0.914	-	-	-	-	0.97	NA	NA	NA	NA	0	0	0	0	0	0	0	0	0	-	-	NA	NA
58	rs2298553	T(PRE)/C	C	5027	T	5161	1	CC	1300	24	3	24.8	4.55	TC	2427	24	3	24.8	4.55	TT	1367	24	3	24.9	4.58	1	0.891	0.722	0.669	0.955	0.634	0.97	0.99	0.962	0.993	0.891	52	28.108	616	24.929	443	26.12	190	25.606	1301	0.694	0.802	0.932	0.951
59	rs2647574	C/T	C	5912	T	4276	1	CC	1715	24	3	24.7	4.35	CT	2482	24	3	24.9	4.67	TT	897	24	3	24.9	4.63	1	0.614	0.352	0.527	0.693	0.333	0.96	0.81	0.962	0.935	0.891	26	14.054	456	18.454	279	16.45	137	18.464	898	0.195	0.963	0.932	0.984
60	rs2708381	C/T	C	7346	T	2674	85	CC	2641	24	3	24.8	4.44	CT	2064	24	3	24.9	4.64	TT	305	24	3	25	4.96	85	0.219	0.15	0.182	0.417	0.0882	0.887	0.771	0.962	0.779	0.833	14	7.865	143	5.878	98	5.865	50	6.868	305	0.505	0.734	0.932	0.951
61	rs2781377	G/A	A	645	G	9539	3	AA	22	24	2.5	25.3	4.39	GA	601	24	3	24.6	4.22	GG	4469	24	3	24.9	4.6	3	0.779	0.782	0.56	0.678	0.891	0.96	0.99	0.962	0.932	0.956	0	0	12	0.486	5	0.295	5	0.674	22	0.528	0.571	0.932	0.923
62	rs28413581	C/T	C	10187	T	1	1	CC	5093	24	3	24.8	4.56	CT	1	38	0	38	NA	TT	0	NA	NA	NA	NA	1	0.0147	-	-	-	-	0.52	NA	NA	NA	NA	0	0	0	0	0	0	0	0	0	-	-	NA	NA
63	rs28502153	C/A	A	3678	C	6512	0	AA	677	24	3	24.8	4.36	CA	2324	24	3	24.8	4.61	CC	2094	24	3	24.9	4.57	0	0.665	0.383	0.612	0.608	0.379	0.96	0.813	0.962	0.912	0.891	20	10.811	325	13.147	226	13.325	106	14.286	677	0.662	0.288	0.932	0.923
64	rs28602966	G/T	G	9884	T	242	32	GG	4822	24	3	24.9	4.57	GT	240	24	3	24.4	4.16	TT	1	26	0	26	NA	32	0.284	-	-	-	-	0.897	NA	NA	NA	NA	0	0	0	0	1	0.059	0	0	1	0.521	0.598	0.932	0.923
65	rs3130453	C/T	C	5340	T	4846	2	CC	1399	24	3	25	4.4	CT	2542	24	3	24.8	4.65	TT	1152	24	3	24.7	4.54	2	0.737	0.712	0.44	0.747	0.488	0.96	0.99	0.962	0.936	0.891	49	26.486	567	22.955	368	21.698	168	22.642	1152	0.447	0.334	0.932	0.923
66	rs3213755	G/A	A	1399	G	8261	265	AA	28	25	3.5	25.4	4.98	GA	1343	24	3	24.7	4.57	GG	3459	24	3	24.9	4.55	265	0.399	0.923	0.184	0.736	0.892	0.926	0.99	0.962	0.935	0.956	0	0	13	0.553	8	0.499	7	0.997	28	0.422	0.174	0.932	0.923
67	rs328	C/G	C	9330	G	858	1	CC	4281	24	3	24.8	4.52	CG	768	24	3	24.9	4.75	GG	45	25	4	24.6	5.2	1	0.61	0.752	0.323	0.948	0.6	0.96	0.99	0.962	0.993	0.891	2	1.081	20	0.809	14	0.825	9	1.213	45	0.668	0.496	0.932	0.923
68	rs34067666	C/T	C	10060	T	130	0	CC	4966	24	3	24.8	4.55	CT	128	24	3	25.3	4.96	TT	1	22	0	22	NA	0	0.33	0.138	0.968	0.137	0.143	0.926	0.771	0.992	0.678	0.833	0	0	1	0.04	0	0	0	0	1	1	0.45	1	0.923
69	rs34291832	G/C	G	10113	C	77	0	GG	5018	24	3	24.8	4.55	GC	77	23	3	24.4	4.83	CC	0	NA	NA	NA	NA	0	0.709	-	-	-	-	0.96	NA	NA	NA	NA	0	0	0	0	0	0	0	0	0	-	-	NA	NA
70	rs34381648	G/T	G	10187	T	3	0	GG	5092	24	3	24.8	4.56	GT	3	24	1	24	1	TT	0	NA	NA	NA	NA	0	0.354	-	-	-	-	0.926	NA	NA	NA	NA	0	0	0	0	0	0	0	0	0	-	-	NA	NA
71	rs34427887	C/T	C	9602	T	576	6	CC	4527	24	3	24.8	4.6	CT	548	24	3	24.8	4.21	TT	14	24	2	24.2	2.75	6	0.281	0.223	0.233	0.3	0.173	0.897	0.771	0.962	0.763	0.833	0	0	8	0.324	6	0.354	0	0	14	0.45	0.442	0.932	0.923
72	rs34672740	C/A	C	10189	A	1	0	CC	5094	24	3	24.8	4.56	CA	1	20	0	20	NA	AA	0	NA	NA	NA	NA	0	0.306	-	-	-	-	0.92	NA	NA	NA	NA	0	0	0	0	0	0	0	0	0	-	-	NA	NA
73	rs34931752	G/A	A	462	G	9724	2	AA	6	25.5	2.5	24.3	4.08	GA	450	24	3	24.5	4.23	GG	4637	24	3	24.9	4.59	2	0.0751	0.056	0.156	0.0775	0.0422	0.843	0.697	0.962	0.565	0.833	0	0	3	0.121	3	0.177	0	0	6	0.805	0.782	0.978	0.951
74	rs34960436	G/A	G	9945	A	245	0	GG	4850	24	3	24.9	4.57	GA	245	24	3	24.3	4.36	AA	0	NA	NA	NA	NA	0	0.0675	-	-	-	-	0.843	NA	NA	NA	NA	0	0	0	0	0	0	0	0	0	-	-	NA	NA
75	rs35001809	C/T	C	9847	T	343	0	CC	4764	24	3	24.8	4.59	CT	319	24	3	24.5	4.12	TT	12	28.5	2.5	27.4	4.56	0	0.0818	0.0778	0.306	0.0452	0.14	0.843	0.7	0.962	0.565	0.833	0	0	4	0.162	4	0.236	4	0.539	12	0.279	0.0664	0.932	0.773
76	rs35032582	C/A	C	5094	A	0	1	CC	5094	24	3	24.8	4.56	CA	0	NA	NA	NA	NA	AA	0	NA	NA	NA	NA	1	-	-	-	-	-	NA	NA	NA	NA	NA	0	0	0	0	0	0	0	0	0	-	-	NA	NA
77	rs35231465	G/A	A	194	G	9996	0	AA	3	24	1	25.3	3.21	GA	188	24	2.5	24.8	4.61	GG	4904	24	3	24.8	4.56	0	0.953	0.822	0.855	0.802	0.844	0.975	0.99	0.982	0.959	0.956	0	0	2	0.081	1	0.059	0	0	3	1	0.571	1	0.923
78	rs35233100	C/T	C	9596	T	594	0	CC	4521	24	3	24.9	4.57	CT	554	24	3	24.6	4.47	TT	20	23	1	23.6	4.06	0	0.271	0.107	0.676	0.121	0.111	0.897	0.771	0.962	0.636	0.833	1	0.541	15	0.607	1	0.059	3	0.404	20	0.0185	0.0976	0.593	0.773
79	rs35391433	C/T	C	9967	T	223	0	CC	4879	24	3	24.8	4.57	CT	209	24	3	24.7	4.4	TT	7	25	2	23.4	3.69	0	0.428	0.244	0.471	0.28	0.219	0.949	0.771	0.962	0.763	0.833	1	0.541	2	0.081	4	0.236	0	0	7	0.113	0.588	0.932	0.923
80	rs35400274	G/A	A	1259	G	7693	619	AA	72	25	3	25.6	4.48	GA	1115	24	3	24.7	4.56	GG	3289	24	3	24.9	4.57	619	0.398	0.268	0.581	0.202	0.375	0.926	0.771	0.962	0.723	0.891	3	1.829	26	1.202	29	1.94	14	2.137	72	0.161	0.079	0.932	0.773
81	rs35699176	G/A	A	391	G	9797	1	AA	7	23	2	25.6	8.42	GA	377	24	3	25.1	4.85	GG	4710	24	3	24.8	4.53	1	0.694	0.886	0.417	0.78	0.991	0.96	0.99	0.962	0.953	0.991	0	0	5	0.202	1	0.059	1	0.135	7	0.629	0.588	0.932	0.923
82	rs35898523	G/T	G	9585	T	603	1	GG	4513	24	3	24.8	4.54	GT	559	24	3	24.7	4.73	TT	22	27.5	2.5	26.6	3.7	1	0.92	0.69	0.881	0.707	0.683	0.97	0.99	0.982	0.935	0.891	0	0	6	0.243	11	0.649	5	0.674	22	0.128	0.0269	0.932	0.773
83	rs36078704	C/T	C	3305	T	149	3368	CC	1578	24	3	24.8	4.63	CT	149	24	2	25.3	4.56	TT	0	NA	NA	NA	NA	3368	0.968	-	-	-	-	0.983	NA	NA	NA	NA	0	0	0	0	0	0	0	0	0	-	-	NA	NA
84	rs36102575	C/T	C	9914	T	276	0	CC	4824	24	3	24.8	4.57	CT	266	24	3	24.9	4.44	TT	5	25	3	25	5.24	0	0.84	0.796	0.578	0.844	0.752	0.96	0.99	0.962	0.97	0.936	1	0.541	1	0.04	2	0.118	1	0.135	5	0.128	0.972	0.932	0.984
85	rs3732781	A/C	A	7168	C	3018	2	AA	2539	24	3	24.8	4.57	AC	2090	24	3	24.9	4.59	CC	464	25	3	25	4.34	2	0.589	0.304	0.708	0.405	0.339	0.96	0.771	0.973	0.779	0.891	13	7.027	215	8.701	167	9.853	69	9.299	464	0.468	0.229	0.932	0.923
86	rs3784589	C/A	A	854	C	9336	0	AA	29	24	3	24.2	3.57	CA	796	25	3	25.3	4.76	CC	4270	24	3	24.8	4.52	0	0.0381	0.0232	0.444	0.0138	0.0449	0.729	0.697	0.962	0.455	0.833	0	0	16	0.647	11	0.649	2	0.27	29	0.585	0.624	0.932	0.923
87	rs3812907	C/T	C	9084	T	1094	6	CC	4052	24	3	24.8	4.49	CT	980	24	3	25	4.85	TT	57	24	3	24.1	4.55	6	0.552	0.463	0.533	0.354	0.607	0.96	0.86	0.962	0.763	0.891	4	2.162	32	1.297	13	0.767	8	1.08	57	0.175	0.145	0.932	0.923
88	rs41281112	C/T	C	10003	T	173	7	CC	4917	24	3	24.8	4.55	CT	169	25	3	25.5	4.67	TT	2	26	1	26	1.41	7	0.0194	-	-	-	-	0.52	NA	NA	NA	NA	0	0	0	0	2	0.118	0	0	2	0.294	0.454	0.932	0.923
89	rs41282820	G/A	A	185	G	10005	0	AA	3	27	3	28.3	5.13	GA	179	24	3	25.1	4.48	GG	4913	24	3	24.8	4.56	0	0.502	0.972	0.246	0.849	0.908	0.96	0.99	0.962	0.97	0.956	0	0	1	0.04	1	0.059	1	0.135	3	0.601	0.359	0.932	0.923
90	rs41291550	T/A	T	10081	A	29	40	TT	5026	24	3	24.8	4.56	TA	29	26	3	26.2	4.92	AA	0	NA	NA	NA	NA	40	0.775	-	-	-	-	0.96	NA	NA	NA	NA	0	0	0	0	0	0	0	0	0	-	-	NA	NA
91	rs4148974	C/T	C	9671	T	519	0	CC	4588	24	3	24.9	4.57	CT	495	24	3	24.5	4.46	TT	12	23	1.5	23.2	2.89	0	0.0722	0.174	0.0409	0.316	0.0983	0.843	0.771	0.962	0.763	0.833	0	0	9	0.364	3	0.177	0	0	12	0.342	0.132	0.932	0.915
92	rs45579335	G/T	G	10051	T	137	1	GG	4957	24	3	24.8	4.57	GT	137	25	2	25.1	4.32	TT	0	NA	NA	NA	NA	1	0.527	-	-	-	-	0.96	NA	NA	NA	NA	0	0	0		0	0	0	0	0	-	-	NA	NA
93	rs45621032	T/A	T	10070	A	114	3	TT	4978	24	3	24.8	4.56	TA	114	25	3	25	4.35	AA	0	NA	NA	NA	NA	3	0.432	-	-	-	-	0.949	NA	NA	NA	NA	0	0	0	0	0	0	0	0	0	-	-	NA	NA
94	rs4639011	C/T	C	9981	T	209	0	CC	4886	24	3	24.8	4.56	CT	209	25	3	25.2	4.64	TT	0	NA	NA	NA	NA	0	0.652	-	-	-	-	0.96	NA	NA	NA	NA	0	0	0	0	0	0	0	0	0	-	-	NA	NA
95	rs4788587	G/A	A	1809	G	8361	10	AA	167	25	3	25.1	4.46	GA	1475	24	3	24.6	4.52	GG	3443	24	3	24.9	4.58	10	0.684	0.464	0.79	0.393	0.583	0.96	0.86	0.982	0.779	0.891	3	1.622	77	3.119	63	3.723	24	3.248	167	0.448	0.314	0.932	0.923
96	rs4910844	A/T	A	7983	T	2203	2	AA	3138	24	3	24.8	4.56	AT	1707	24	3	24.9	4.58	TT	248	24	3	24.5	4.43	2	0.261	0.245	0.432	0.122	0.492	0.897	0.771	0.962	0.636	0.891	9	4.865	119	4.816	88	5.192	32	4.313	248	0.837	0.816	0.978	0.954
97	rs497116	A(PRE)/G	A	5095	G	0	0	AA	5095	24	3	24.8	4.56	AG	0	NA	NA	NA	NA	GG	0	NA	NA	NA	NA	0	-	-	-	-	-	NA	NA	NA	NA	NA	0	0	0	0	0	0	0	0	0	-	-	NA	NA
98	rs4985556	C/A	A	1027	C	9143	10	AA	69	25	3	25	4.19	CA	889	24	3	24.9	4.68	CC	4127	24	3	24.8	4.54	10	0.92	0.698	0.835	0.735	0.684	0.97	0.99	0.982	0.935	0.891	1	0.541	30	1.216	29	1.716	9	1.213	69	0.482	0.397	0.932	0.923
99	rs499037	G/A	G	9999	A	123	34	GG	4938	24	3	24.8	4.57	GA	123	25	3	25.1	4.19	AA	0	NA	NA	NA	NA	34	0.833	-	-	-	-	0.96	NA	NA	NA	NA	0	0	0	0	0	0	0	0	0	-	-	NA	NA
100	rs541169	C/T	C	5834	T	3152	602	CC	1859	24	3	24.8	4.63	CT	2116	24	3	24.9	4.58	TT	518	25	3	24.9	4.38	602	0.819	0.958	0.538	0.737	0.74	0.96	0.99	0.962	0.935	0.936	13	7.879	242	11.121	192	12.886	71	10.725	518	0.139	0.351	0.932	0.923
101	rs55727303	C/T	C	9950	T	152	44	CC	4899	24	3	24.8	4.55	CT	152	24	3	25.2	4.9	TT	0	NA	NA	NA	NA	44	0.222	-	-	-	-	0.887	NA	NA	NA	NA	0	0	0	0	0	0	0	0	0	-	-	NA	NA
102	rs57026471	C/T	C	8852	T	1336	1	CC	3856	24	3	24.8	4.5	CT	1140	24	3	24.9	4.73	TT	98	24.5	3	24.8	4.71	1	0.695	0.394	0.878	0.409	0.419	0.96	0.813	0.982	0.779	0.891	5	2.703	44	1.781	36	2.123	13	1.752	98	0.664	0.935	0.932	0.982
103	rs5744168	G/A	A	444	G	9746	0	AA	8	24.5	3.5	25	5.07	GA	428	24	3	25.1	4.9	GG	4659	24	3	24.8	4.53	0	0.753	0.469	0.871	0.576	0.604	0.96	0.86	0.982	0.912	0.891	40	30.075	595	31.666	405	31.815	165	29.623	1205	0.786	0.592	0.973	0.923
104	rs57809907	C/A	A	571	C	9615	2	AA	18	24	2	23.8	3.52	CA	535	24	3	24.8	4.53	CC	4540	24	3	24.8	4.57	2	0.367	0.407	0.203	0.552	0.306	0.926	0.817	0.962	0.912	0.871	1	0.541	10	0.405	6	0.354	1	0.135	18	0.614	0.278	0.932	0.923
105	rs61730422	G/A	A	866	G	9324	0	AA	35	25	2	24.6	3.55	GA	796	24	3	24.7	4.78	GG	4264	24	3	24.9	4.52	0	0.582	0.312	0.68	0.347	0.299	0.96	0.771	0.962	0.763	0.871	1	0.541	15	0.607	16	0.943	3	0.404	35	0.458	0.926	0.932	0.982
106	rs61731313	C/T	C	10188	T	2	0	CC	5093	24	3	24.8	4.56	CT	2	24.5	1.5	24.5	2.12	TT	0	NA	NA	NA	NA	0	0.604	0.781	0.478	0.332	0.807	0.96	0.99	0.962	0.763	0.956	49	35.507	585	32.125	430	33.308	171	30.159	1235	0.482	0.452	0.932	0.923
107	rs61737751	C/T	C	9763	T	427	0	CC	4673	24	3	24.8	4.52	CT	417	25	3	25.3	4.99	TT	5	29	2	28.4	4.56	0	0.205	0.241	0.146	0.311	0.189	0.887	0.771	0.962	0.763	0.833	0	0	1	0.04	2	0.118	2	0.27	5	0.334	0.0786	0.932	0.773
108	rs61750839	G/A	G	9182	A	540	234	GG	4321	24	3	24.9	4.56	GA	540	24	3	24.7	4.67	AA	0	NA	NA	NA	NA	234	0.584	-	-	-	-	0.96	NA	NA	NA	NA	0	0	0	0	0	0	0	0	0	-	-	NA	NA
109	rs61751875	G/A	G	10185	A	5	0	GG	5090	24	3	24.8	4.56	GA	5	26	5	26.8	6.02	AA	0	NA	NA	NA	NA	0	0.207	-	-	-	-	0.887	NA	NA	NA	NA	0	0	0	0	0	0	0	0	0	-	-	NA	NA
110	rs61753375	C/T	C	9940	T	74	88	CC	4933	24	3	24.8	4.56	CT	74	25	3	25	4.71	TT	0	NA	NA	NA	NA	88	0.428	-	-	-	-	0.949	NA	NA	NA	NA	0	0	0	0	0	0	0	0	0	-	-	NA	NA
111	rs61942233	C/T	C	10050	T	132	4	CC	4960	24	3	24.8	4.55	CT	130	25	3	25.6	4.87	TT	1	29	0	29	NA	4	0.757	-	-	-	-	0.96	NA	NA	NA	NA	0	0	0	0	1	0.059	0	0	1	0.513	0.596	0.932	0.923
112	rs62154921	G/T	G	9780	T	382	14	GG	4706	24	3	24.8	4.52	GT	368	25	3	25.1	5.08	TT	7	24	3	23.9	3.72	14	0.0299	0.0201	0.95	0.0238	0.169	0.668	0.697	0.992	0.565	0.833	46	31.724	610	33.425	396	31.329	185	33.454	1237	0.635	0.764	0.932	0.951
113	rs62239058	C/A	C	10086	A	100	2	CC	4993	24	3	24.8	4.56	CA	100	24.5	3.5	24.7	4.77	AA	0	NA	NA	NA	NA	2	0.184	-	-	-	-	0.887	NA	NA	NA	NA	0	0	0	0	0	0	0	0	0	-	-	NA	NA
114	rs6671527	G/A	A	5078	G	5112	0	AA	1252	24	3	24.8	4.53	GA	2574	24	3	24.8	4.52	GG	1269	24	3	24.9	4.68	0	0.102	0.0508	0.797	0.0859	0.204	0.887	0.697	0.982	0.565	0.833	40	28.986	611	32.726	402	31.455	170	30.303	1223	0.607	0.432	0.932	0.923
115	rs67047829	G/A	A	954	G	9236	0	AA	56	23	3	22.9	3.68	GA	842	24	3	24.7	4.44	GG	4197	24	3	24.9	4.59	0	0.00551	0.043	0.00354	0.218	0.00972	0.52	0.697	0.35	0.723	0.833	4	2.162	36	1.456	14	0.825	2	0.27	56	0.0081	0.00109	0.421	0.113
116	rs6907580	G/A	A	502	G	9688	0	AA	8	24	1.5	23.9	2.75	GA	486	24	3	24.5	4.33	GG	4601	24	3	24.9	4.58	0	0.138	0.0634	0.363	0.0787	0.054	0.887	0.697	0.962	0.565	0.833	0	0	4	0.162	4	0.236	0	0	8	0.623	0.749	0.932	0.951
117	rs71377306	C/T	C	9682	T	474	17	CC	4618	24	3	24.8	4.55	CT	446	24	3	25.1	4.59	TT	14	26.5	4.5	26.3	4.76	17	0.349	0.244	0.291	0.328	0.193	0.926	0.771	0.962	0.763	0.833	0	0	5	0.203	4	0.236	5	0.678	14	0.216	0.0472	0.932	0.773
118	rs72856718	C/A	A	957	C	9219	7	AA	51	24	3	24.9	4.37	CA	855	24	3	24.8	4.23	CC	4182	24	3	24.8	4.63	7	0.579	0.327	0.566	0.397	0.299	0.96	0.771	0.962	0.779	0.871	0	0	27	1.094	17	1.003	7	0.945	51	0.667	0.855	0.932	0.956
119	rs74118444	G/T	G	9761	T	9	210	GG	4876	24	3	24.8	4.55	GT	9	26	3	26.4	4.25	TT	0	NA	NA	NA	NA	210	0.226	0.805	0.106	0.177	0.277	0.887	0.99	0.962	0.701	0.871	45	34.351	619	33.623	418	32.378	168	29.893	1250	0.399	0.0968	0.932	0.773
120	rs74437357	G/A	A	218	G	9968	2	AA	1	28	0	28	NA	GA	216	24	3	24.7	4.78	GG	4876	24	3	24.8	4.55	2	0.557	-	-	-	-	0.96	NA	NA	NA	NA	0	0	0	0	1	0.059	0	0	1	0.513	0.597	0.932	0.923
121	rs7447815	C/G	C	6484	G	3702	2	CC	2076	24	3	24.8	4.7	CG	2332	24	3	24.8	4.47	GG	685	24	3	24.8	4.42	2	0.658	0.421	0.883	0.369	0.611	0.96	0.817	0.982	0.763	0.891	20	10.811	323	13.072	245	14.446	97	13.09	685	0.414	0.386	0.932	0.923
122	rs74830030	G/A	G	10177	A	1	6	GG	5088	24	3	24.8	4.56	GA	1	25	0	25	NA	AA	0	NA	NA	NA	NA	6	-	-	-	-	-	NA	NA	NA	NA	NA	0	0	0	0	0	0	0	0	0	-	-	NA	NA
123	rs7485773	C/T	C	9912	T	274	2	CC	4820	24	3	24.9	4.58	CT	272	24	3	24.5	4.2	TT	1	23	0	23	NA	2	0.219	0.0873	0.839	0.0834	0.0935	0.887	0.72	0.982	0.565	0.833	0	0	1	0.04	0	0	0	0	1	1	0.45	1	0.923
124	rs74969489	A/T	A	10022	T	164	2	AA	4930	24	3	24.8	4.58	AT	162	24	3	24.4	3.75	TT	1	22	0	22	NA	2	0.0799	0.039	0.279	0.0493	0.0322	0.843	0.697	0.962	0.565	0.833	0	0	1	0.04	0	0	0	0	1	1	0.45	1	0.923
125	rs7499011	G/A	A	3683	G	4407	1050	AA	737	24	3	24.8	4.41	GA	2209	24	3	24.9	4.63	GG	1099	24	3	24.6	4.44	1050	0.215	0.125	0.702	0.097	0.424	0.887	0.771	0.973	0.565	0.891	25	17.483	352	17.968	251	18.579	109	18.412	737	0.97	0.669	1	0.929
126	rs75411676	G/T	G	9648	T	528	7	GG	4560	24	3	24.8	4.56	GT	528	25	3	25.1	4.52	TT	0	NA	NA	NA	NA	7	0.378	-	-	-	-	0.926	NA	NA	NA	NA	0	0	0	0	0	0	0	0	0	-	-	NA	NA
127	rs76101114	C/G	C	10180	G	8	1	CC	5086	24	3	24.8	4.56	CG	8	26	3	27.4	5.6	GG	0	NA	NA	NA	NA	1	0.186	-	-	-	-	0.887	NA	NA	NA	NA	0	0	0	0	0	0	0	0	0	-	-	NA	NA
128	rs76330087	G/A	G	10188	A	2	0	GG	5093	24	3	24.8	4.56	GA	2	26.5	4.5	26.5	6.36	AA	0	NA	NA	NA	NA	0	0.159	0.934	0.104	0.0891	0.371	0.887	0.99	0.962	0.565	0.891	49	35.507	585	32.554	408	31.652	196	35.443	1238	0.374	0.618	0.932	0.923
129	rs76438938	C/T	C	9877	T	313	0	CC	4784	24	3	24.8	4.56	CT	309	24	3	25.2	4.56	TT	2	28.5	2.5	28.5	3.54	0	0.539	0.57	0.321	0.62	0.524	0.96	0.925	0.962	0.912	0.891	0	0	0	0	1	0.059	1	0.135	2	0.191	0.0975	0.932	0.773
130	rs77002186	G/A	G	10005	A	185	0	GG	4910	24	3	24.8	4.55	GA	185	24	3	25.1	4.78	AA	0	NA	NA	NA	NA	0	0.529	-	-	-	-	0.96	NA	NA	NA	NA	0	0	0	0	0	0	0	0	0	-	-	NA	NA
131	rs78283108	G/A	G	10180	A	6	2	GG	5087	24	3	24.8	4.56	GA	6	24.5	4.5	25.2	5.71	AA	0	NA	NA	NA	NA	2	0.713	-	-	-	-	0.96	NA	NA	NA	NA	0	0	0	0	0	0	0	0	0	-	-	NA	NA
132	rs7904983	G/A	G	10186	A	2	1	GG	5092	24	3	24.8	4.56	GA	2	20.5	1.5	20.5	2.12	AA	0	NA	NA	NA	NA	1	0.242	-	-	-	-	0.887	NA	NA	NA	NA	0	0	0	0	0	0	0	0	0	-	-	NA	NA
133	rs79892855	G/A	G	10189	A	1	0	GG	5094	24	3	24.8	4.56	GA	1	29	0	29	NA	AA	0	NA	NA	NA	NA	0	-	-	-	-	-	NA	NA	NA	NA	NA	0	0	0	0	0	0	0	0	0	-	-	NA	NA
134	rs80072371	C/A	A	639	C	9539	6	AA	19	24	2	24.1	3.01	CA	601	24	3	24.9	4.62	CC	4469	24	3	24.8	4.56	6	0.364	0.864	0.155	0.934	0.684	0.926	0.99	0.962	0.993	0.891	0	0	10	0.406	8	0.472	1	0.135	19	0.649	0.727	0.932	0.951
135	rs8072510	G/T	G	8909	T	1225	28	GG	3907	24	3	24.8	4.56	GT	1095	25	3	25	4.62	TT	65	25	2	24.6	3.53	28	0.148	0.318	0.144	0.17	0.545	0.887	0.771	0.962	0.701	0.891	3	1.622	27	1.099	30	1.778	5	0.677	65	0.0915	0.844	0.932	0.956
136	rs8192646	C/T	C	9691	T	491	4	CC	4614	24	3	24.9	4.57	CT	463	24	3	24.7	4.49	TT	14	25.5	3.5	25.2	4.34	4	0.482	0.267	0.537	0.303	0.243	0.96	0.771	0.962	0.763	0.833	1	0.543	4	0.162	7	0.413	2	0.27	14	0.273	0.545	0.932	0.923
137	rs850763	G/T	G	8031	T	2081	39	GG	3172	24	3	24.9	4.57	GT	1687	24	3	24.7	4.55	TT	197	24	3	24.9	4.45	39	0.663	0.833	0.385	0.512	0.534	0.96	0.99	0.962	0.889	0.891	45	34.351	611	33.099	407	31.922	185	32.86	1248	0.88	0.639	1	0.923
138	rs863362	C/T	C	5432	T	4756	1	CC	1442	24	3	24.9	4.75	CT	2548	24	3	24.8	4.45	TT	1104	24	3	24.9	4.55	1	0.456	0.253	0.313	0.894	0.212	0.96	0.771	0.962	0.979	0.833	47	32.639	627	33.316	409	32.46	169	30.287	1252	0.614	0.234	0.932	0.923
139	rs9886752	G/A	A	1222	G	8960	4	AA	72	23	3	24.6	4.83	GA	1078	25	3	25.1	4.65	GG	3941	24	3	24.8	4.53	4	0.0184	0.0088	0.657	0.00488	0.0237	0.52	0.697	0.962	0.242	0.833	3	1.622	39	1.579	21	1.24	9	1.213	72	0.765	0.335	0.97	0.923
